# Supplementary material for: Use of Adjuvanted Quadrivalent Influenza Vaccine in Older-Age Adults: A Systematic Review of Economic Evidence
Source: MDPI journal article supplement (doi:10.3390/vaccines12050523), 2024-05-10
Supplement: s1 [file s1]

Table S1: PICO search strategy

|          |  |                                                                                                                                                                                                                                                                                                                                                              |
|----------|--|--------------------------------------------------------------------------------------------------------------------------------------------------------------------------------------------------------------------------------------------------------------------------------------------------------------------------------------------------------------|
|          |  | <b>PICO [Pubmed]</b>                                                                                                                                                                                                                                                                                                                                         |
| <b>P</b> |  | "older adults" [tiab] OR<br>"older adult" [tiab] OR<br>Elderly [tiab] OR<br>senior* [tiab] OR<br>"aged 65+" [tiab] OR<br>geriatric* [tiab] OR<br>"aged 65" [tiab] OR<br>"aged ≥65 years" [tiab] OR<br>"aged 65+" [tiab] OR<br>"≥65" [tiab] OR<br>"65+" [tiab]                                                                                                |
|          |  | <b>AND</b>                                                                                                                                                                                                                                                                                                                                                   |
| <b>I</b> |  | "aQIV" [tiab] OR<br>"Fluad" [tiab] OR<br>"MF59"[ tiab] OR<br>Adjuvanted [tiab] OR<br>"MF59-adjuvanted quadrivalent influenza vaccine"[tiab] OR<br>"Adjuvanted quadrivalent influenza vaccine"[tiab] OR<br>"Quadrivalent adjuvanted influenza vaccine"[tiab] OR<br>"adjuvanted quadrivalent"[tiab] OR<br>"quadrivalent adjuvanted"[tiab] OR<br>"QIV-AD"[tiab] |
|          |  | <b>AND</b>                                                                                                                                                                                                                                                                                                                                                   |
| <b>C</b> |  | Comparator can be no vaccine, standard dose QIV or high dose TIV or QIV.<br>These terms are not explicitly used in the search strategy because of the number of hits they generate. However, the term adjuvanted and QIV and CEA (which by definition is comparative will capture relevant comparators).                                                     |
|          |  | <b>AND</b>                                                                                                                                                                                                                                                                                                                                                   |
| <b>O</b> |  | Cost* [tiab] OR<br>Econ* [tiab] OR<br>"Cost-effectiveness" [tiab] OR<br>"Cost-utility" [tiab] OR<br>"Cost-benefit" [tiab] OR<br>"Economic evaluation" [tiab] OR                                                                                                                                                                                              |

|              |                                                                                                                                                                                                                                             |
|--------------|---------------------------------------------------------------------------------------------------------------------------------------------------------------------------------------------------------------------------------------------|
| <b>LIMIT</b> | <p>"Economic analysis" [tiab] OR<br/>"Health technology assessment"[tiab] OR<br/>HTA [tiab] OR<br/>"Budget impact analysis" [tiab] OR<br/>BIA [tiab] OR<br/>Model [tiab] OR<br/>Markov [tiab]<br/>Human, English language, 2013-present</p> |
|--------------|---------------------------------------------------------------------------------------------------------------------------------------------------------------------------------------------------------------------------------------------|

Table S2: Cheers (2022) checklist

| CHEERS (2022) Checklist* |                                                                                                                                                              | Calabro et al. 2022 | Fochesato et al. 2022 | Jacob et al. 2023 | Kohli et al., 2021 | Kohli et al., 2022 | Marbaix et al. 2023 | Nguyen et al., 2023 | Ruiz-aragon et al. 2022 | Ruiz-aragon et al. 2023 | Rumi et al. 2023 |
|--------------------------|--------------------------------------------------------------------------------------------------------------------------------------------------------------|---------------------|-----------------------|-------------------|--------------------|--------------------|---------------------|---------------------|-------------------------|-------------------------|------------------|
| 1                        | <b>Title:</b> Identify the study as an economic evaluation and specify the interventions being compared.                                                     | 1                   | 1                     | 2                 | 4603               | 1                  | 608                 | 1                   | 1                       | 1                       | 1                |
| 2                        | <b>Abstract:</b> provide a structured summary that highlights context, key methods, results, and alternative analyses                                        | 1                   | 1                     | 1                 | 4603               | 1                  | 608                 | 1                   | 1                       | 1                       | 1                |
| 3                        | <b>Background and objectives:</b> give the context for the study, the study question, and its practical relevance for decision making in policy or practice. | 2                   | 1-2                   | 1-2               | 4603               | 1-2                | 608 to 609          | 1-2                 | 1-2                     | 1-2                     | 2                |
| 4                        | <b>Methods:</b> indicate whether a health economic analysis plan was developed and where available.                                                          | No                  | No                    | No                | No                 | No                 | No                  | No                  | No                      | No                      | No               |
| 5                        | <b>Study population:</b> describe characteristics of the study population (such as age range, demographics, socioeconomic, or clinical characteristics).     | 3**                 | 2**                   | 2**               | 4603**             | 2**                | 609**               | 2**                 | 2**                     | 2**                     | 2**              |
| 6                        | <b>Setting and location:</b> provide relevant contextual information that may influence findings.                                                            | 3                   | 3                     | 3-4               | 4604               | 2                  | 609                 | 2                   | 2                       | 2                       | 2                |

|    |                                                                                                             |                  |     |   |      |   |     |         |     |     |   |
|----|-------------------------------------------------------------------------------------------------------------|------------------|-----|---|------|---|-----|---------|-----|-----|---|
| 7  | <b>Comparators:</b> describe the interventions or strategies being compared and why chosen.                 | 1                | 2   | 3 | 4603 | 2 | 609 | 2       | 2   | 2   | 2 |
| 8  | <b>Study perspective:</b> state the perspective(s) adopted by the study and why chosen                      | 4                | 2   | 3 | 4604 | 6 | 610 | 3       | 2   | 3-4 | 2 |
| 9  | <b>Time horizon:</b> state the time horizon for the study and why appropriate.                              | 4                | 7** | 3 | 4604 | 6 | 610 | unclear | 2   | 2   | 2 |
| 10 | <b>Discount rate:</b> report the discount rate(s) and reason chosen.                                        | 4                | 8** | 3 | 4604 | 2 | 610 | 4       | 2   | 3   | 2 |
| 11 | <b>Selection of outcomes:</b> describe what outcomes were used as the measure(s) of benefit(s) and harm(s). | 4 (and Figure 1) | 8   | 6 | 4604 | 2 | 612 | 4       | 2   | 3   | 2 |
| 12 | <b>Measurement of outcomes:</b> describe how outcomes used to capture benefit(s) and harm(s) were measured. | 4                | 8   | 6 | 4604 | 6 | 610 | 4       | 4   | 4   | 3 |
| 13 | <b>Valuation of outcomes:</b> describe the population and methods used to measure and value outcomes.       | No               | 8   | 6 | 4604 | 6 | 610 | ?       | 4-5 | 4   | 3 |
| 14 | <b>Measurement and valuation of resources and costs:</b> describe how costs were valued.                    | No               | 7   | 6 | 4604 | 6 | 610 | 3-4     | 5   | 4   | 3 |

|    |                                                                                                                                                                                   |    |     |     |               |      |         |         |      |      |      |
|----|-----------------------------------------------------------------------------------------------------------------------------------------------------------------------------------|----|-----|-----|---------------|------|---------|---------|------|------|------|
| 15 | <b>Currency, price and date conversion:</b> report the dates of the estimated resource quantities and unit costs, plus the currency and year of conversion.                       | No | No  | No  | 4604          | 6**  | 610     | unclear | 5    | 4    | 3    |
| 16 | <b>Rationale and description of model:</b> If modeling is used, describe in detail and why used. Report if the model is publicly available and where it can be accessed.          | No | 3** | 2** | 4604**        | 4**  | 609**   | 2, 3**  | 2**  | 2**  | 3    |
| 17 | <b>Analytics and assumptions:</b> describe any methods for analysing or statistically transforming data, any extrapolation methods, and approaches for validating any model used. | No | No  | No  | none          | none | none    | 2**     | none | None | None |
| 18 | <b>Characterising heterogeneity:</b> describe any methods used for estimating how the results of the study vary for subgroups.                                                    | No | No  | No  | None          | None | None    | None    | None | None | None |
| 19 | <b>Characterising distributional effects:</b> describe how impacts are distributed across different individuals or adjustments made to reflect priority populations.              | No | No  | No  | None          | None | None    | None    | None | None | None |
| 20 | <b>Characterising uncertainty:</b> describe methods to characterize any sources of uncertainty in the analysis.                                                                   | No | 8   | 8   | 4605 and 4606 | 7-11 | 613-615 | 5-7     | 5    | 5    | 5    |



|    |                                                                                                                                                                                                                        |                |       |         |      |       |     |     |   |     |        |
|----|------------------------------------------------------------------------------------------------------------------------------------------------------------------------------------------------------------------------|----------------|-------|---------|------|-------|-----|-----|---|-----|--------|
| 26 | <b>Study findings, limitations, generalisability and current knowledge:</b> report key findings, limitations, ethical or equity considerations not captured, and how these could affect patients, policy, or practice. | 10 (partially) | 11-12 | 7 to 13 | 4609 | 11-13 | 616 | 8-9 | 8 | 6-8 | 4 to 7 |
| 27 | <b>Source of funding:</b> describe how the study was funded and any role of the funder in the identification, design, conduct, and reporting of the analysis                                                           | 10             | 12    | 15      | 4609 | 13    | 617 | 9   | 9 | 9   | 7      |
| 28 | <b>Conflicts of interest:</b> report authors conflicts of interest according to journal or International Committee of Medical Journal Editors requirements.                                                            | 10             | 12    | 15      | 4609 | 13    | 617 | 9   | 9 | 9   | 9      |

*\*The numbers in the table refer to the page number on which the item was reported in the associated research paper*

Table S3: Costs updated to EUR €2023

| Author, year          | Country, currency (year) | Original costs                                          | Updated costs €2023                                     |
|-----------------------|--------------------------|---------------------------------------------------------|---------------------------------------------------------|
| Calabro et al. 2022   | Italy; EUR €2020         | Payer ICER: €14,441/QALY<br>Societal ICER: €11,748/QALY | Payer ICER: €15,632/QALY<br>Societal ICER: €12,717/QALY |
| Fochesato et al. 2022 | Spain; EUR €2021         | Payer ICER:<br>€2,240/QALY (for rVE of 34.6%)           | €2,458/QALY (for rVE of 34.6%)                          |

|                     |                    |                                                                                                                                                                                                                                     |                                                                                                                                                                                                                                    |
|---------------------|--------------------|-------------------------------------------------------------------------------------------------------------------------------------------------------------------------------------------------------------------------------------|------------------------------------------------------------------------------------------------------------------------------------------------------------------------------------------------------------------------------------|
|                     |                    | €6,694/QALY (for rVE of 13.9%)<br>Societal ICER:<br>Cost saving (for rVE of 34.6%)<br>€3,936/QALY (for rVE of 13.9%)                                                                                                                | €7,347/QALY (for rVE of 13.9%)<br>Societal ICER:<br>Cost saving (for rVE of 34.6%)<br>€4,320/QALY (for rVE of 13.9%)                                                                                                               |
| Jacob et al. 2023   | Nodic; EUR €2022   | <b>Denmark:</b><br>Payer ICER: €10,170/QALY<br>Societal ICER: €5,472/QALY<br><b>Norway:</b><br>Payer ICER: €12,515 /QALY<br>Societal ICER: €7,906 /QALY<br><b>Sweden:</b><br>Payer ICER: €9,894 /QALY<br>Societal ICER: €4,856/QALY | <b>Denmark:</b><br>Payer ICER: €10,156/QALY<br>Societal ICER: €5,464/QALY<br><b>Norway:</b><br>Payer ICER: €12,516/QALY<br>Societal ICER: €7,906/QALY<br><b>Sweden:</b><br>Payer ICER: €10,540 /QALY<br>Societal ICER: €5,173/QALY |
| Kohli et al. 2021   | UK; GBP £2020*     | £12.94 (for rVE of -2.5%)<br>£10.44 (for rVE of 3.2%)<br>£7.67 (for rVE of 8.9%)                                                                                                                                                    | €16.91 (for rVE of -2.5%)<br>€13.65 (for rVE of 3.2%)<br>€10.03 (for rVE of 8.9%)                                                                                                                                                  |
| Kohli et al. 2022   | Germany; EUR €2022 | Payer ICER: €20,000/QALY<br>Societal ICER: €17,200/QALY                                                                                                                                                                             | Payer ICER: €21,111/QALY<br>Societal ICER: €18,156/QALY                                                                                                                                                                            |
| Marbaix et al. 2023 | Belgium; EUR €2023 | Payer ICER: €15,227/QALY<br>Societal ICER: not calculated                                                                                                                                                                           | Payer ICER: €15,227/QALY<br>Societal ICER: not calculated                                                                                                                                                                          |



|                         |                    |                                                                                             |                                                                                              |
|-------------------------|--------------------|---------------------------------------------------------------------------------------------|----------------------------------------------------------------------------------------------|
| Nguyen et al. 2023      | Ireland; EUR €2022 | Payer ICER: €12,970/QALY<br>Societal ICER: €2,420/QALY                                      | Payer ICER: €13,605/QALY<br>Societal ICER: €2,538/QALY                                       |
| Ruiz-Aragon et al. 2022 | Spain; EUR €2021   | saving of €63.6 M<br>saving of €64.2 M<br>€101,612/QALY                                     | saving of €67.0 M<br>saving of €67.7 M<br>€107,082/QALY                                      |
| Ruiz-Aragon et al. 2023 | Spain; EUR €2021   | Payer perspective:<br>saving of €63.6 M<br>Societal perspective:<br>saving of €64.2 M       | Payer perspective:<br>saving of €69.8 M<br>Societal perspective:<br>saving of €70.5 M        |
| Rumi et al. 2023        | Italy; EUR €2019   | Payer ICER: €9,805 (where relative efficacy of aQIV vs standard dose QIV was assumed as 6%) | Payer ICER: €10,781 (where relative efficacy of aQIV vs standard dose QIV was assumed as 6%) |

\*Updated from £2020 to €2023 at exchange rate of £1=€1.18 (16/04/24); rVE=relative vaccine effectiveness

\*Conversion tool: <https://epi.ioe.ac.uk/costconversion/default.aspx>
